# Supplementary material
Source: PubMed Central journal article supplement (PMC5726601)
Supplement: NIHMS913292-supplement-1.pdf [file NIHMS913292-supplement-1.pdf]

## Somech et al., 2017 Supplementary Information

### Disruption of thrombocyte and T lymphocyte development by a mutation in *ARPC1B*

Raz Somech<sup>1,2</sup>, Atar Lev<sup>1,2</sup>, Yu Nee Lee<sup>1,2</sup>, Amos J Simon<sup>1,2,3</sup>, Ortal Barel<sup>2,4</sup>, Ginette Schiby<sup>5</sup>, Camila Avivi<sup>5</sup>, Iris Barshack<sup>5</sup>, Michele Rhodes<sup>7</sup>, Jiejing Yin<sup>7</sup>, Minshi Wang<sup>7</sup>, Yibin Yang<sup>7</sup>, Jennifer Rhodes<sup>7</sup>, Nufar Marcus<sup>8</sup>, Ben-Zion Garty<sup>8</sup>, Jerry Stein<sup>9</sup>, Ninette Amariglio<sup>2,3,4,6</sup>, Gideon Rechavi<sup>2,4</sup>, David L. Wiest<sup>7,10</sup>, and Yong Zhang<sup>7,10</sup>

**A****TRB**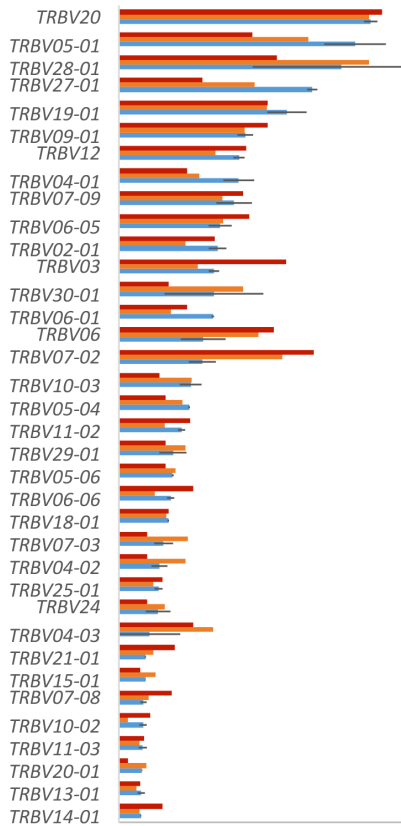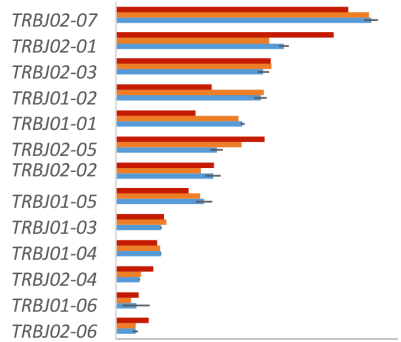**B****TRG**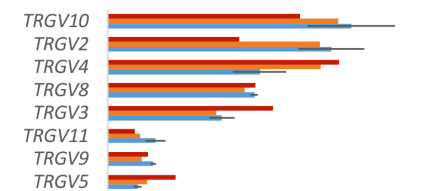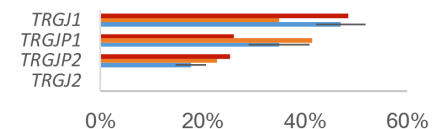**C****IGH**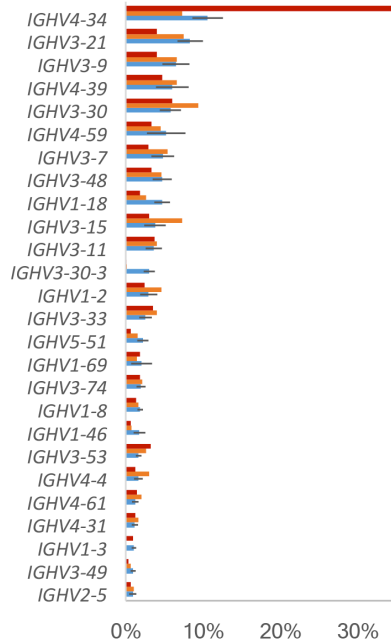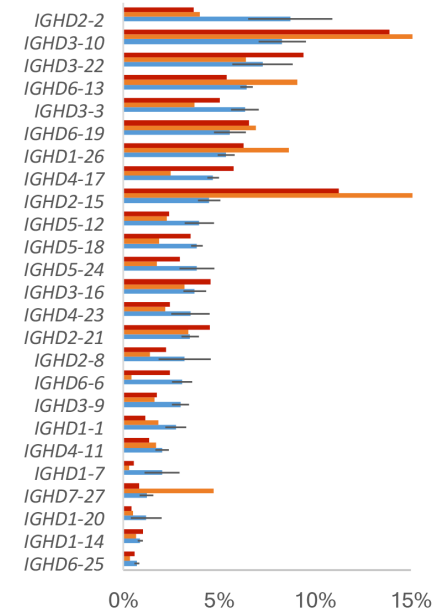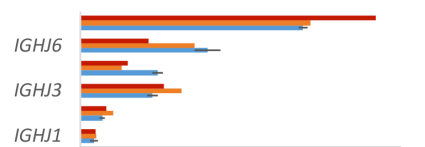

■ pt 1 ■ pt 2 ■ C (n=2, 4)

**Supplementary Figure 1. Differential *VDJ* gene usage relative to the number of unique sequences in the patients' *TRB*, *TRG* and *IGH* repertoires.** The frequencies of gene usages based on unique sequences for the patients for *TRBV* and *TRBJ* genes (A), *TRGV* and *TRGJ* genes (B) and *IGHV*, *IGHD* and *IGHJ* genes (C), are compared to the frequencies (average  $\pm$  SEM) of gene usage of two controls in *TRB* repertoire and four controls in *TRG* and *IGH* repertoires.

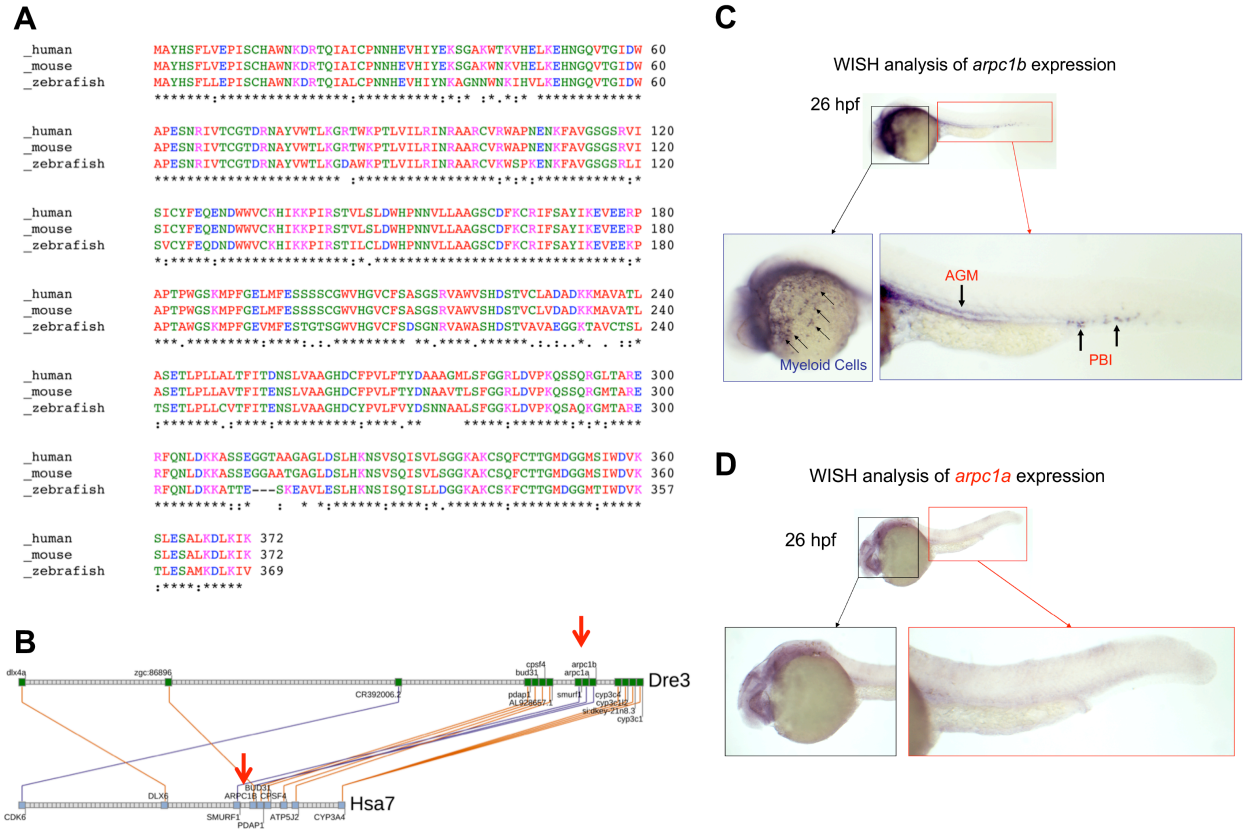

**Supplementary Figure 2. WISH analysis of *arpc1b* and *arpc1a* expression in zebrafish hematopoietic system.**

*A*, Amino acid sequence alignments of human, mouse and zebrafish *arpc1b*. \* beneath the sequences indicates identity. *B*, Syntenic relationship between zebrafish *arpc1b* (on Dre.3) and human *ARPC1B* (on Hsa.7). Red arrows indicate that the *arpc1b* gene in zebrafish and the *ARPC1B* gene in humans are flanked by other syntenic orthologs. *C-D*, WISH analysis on 26hpf zebrafish embryo for *arpc1b* (**C**) and *arpc1a* (**D**). Lateral view with head to the left. Insets depict the blood cells in yolk (black arrows), AGM and PBI regions (bold black arrows). *Aprc1a* WISH exhibits staining in head and trunk areas but unlike that of *arpc1b*, it does not stain hematopoietic cells.

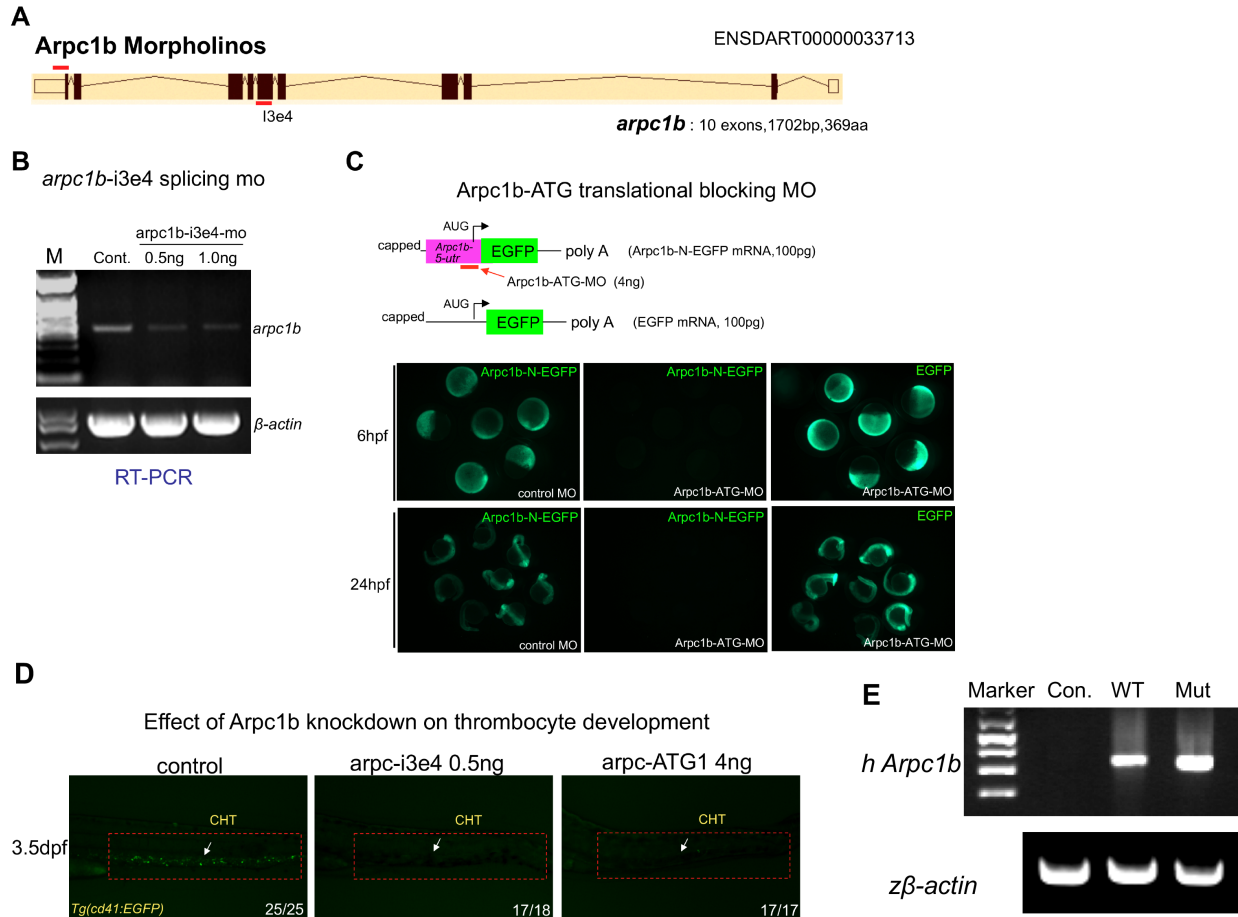

### Supplementary Figure 3. Validation of *arpc1b* knockdown in zebrafish embryo.

*A.* Genomic structure of zebrafish *arpc1b* locus. Red lines mark the targeting sites of translation-blocking or splicing site MO. *B.* RT-PCR examination of endogenous *arpc1b* expression in control and *arpc1b* splice site MO injected embryos.  $\beta$ -actin serves as the internal loading control. *C.* EGFP reporter assay for functional validation of *arpc1b* ATG (translation-blocking) MO. *D.* Thrombocyte development was disrupted after *arpc1b* knockdown in 3.5dpf *Tg(cd41:EGFP)* transgenic embryos (red rectangles and white arrows). The embryos were photographed by lateral views. The numbers on the images refer to the fraction of embryos with the depicted phenotype. CHT: caudal hematopoietic tissue. *E.* The presence of the intact and mutant human *ARPC1B* mRNA employed to rescue development was verified by RT-PCR analysis at 3.5dpf.

**Supplementary Table 1. Summary of the *V(D)J* gene usages in the total and unique sequences of TCR and BCR repertoires from patients and controls.**

| TRB-Total |                        |       |       |              |              |        |        |     |     |           |
|-----------|------------------------|-------|-------|--------------|--------------|--------|--------|-----|-----|-----------|
| Total     | Controls (mean; n = 2) | SEM   | 2xSEM | Mean - 2xSEM | Mean + 2xSEM | pt1    | pt2    | pt1 | pt2 | Total     |
| TRBV05-05 | 0.51%                  | 0.02% | 0.04% | 0.47%        | 0.54%        | 1.11%  | 0.46%  | +   | -   | TRBV05-05 |
| TRBV06-04 | 0.54%                  | 0.08% | 0.15% | 0.38%        | 0.69%        | 0.71%  | 0.65%  | +   |     | TRBV06-04 |
| TRBV12-05 | 0.66%                  | 0.08% | 0.15% | 0.50%        | 0.81%        | 0.63%  | 0.45%  |     | -   | TRBV12-05 |
| TRBV07-06 | 0.68%                  | 0.05% | 0.10% | 0.57%        | 0.78%        | 0.79%  | 0.63%  | +   |     | TRBV07-06 |
| TRBV13-01 | 0.69%                  | 0.11% | 0.22% | 0.47%        | 0.91%        | 0.55%  | 0.49%  |     |     | TRBV13-01 |
| TRBV14-01 | 0.71%                  | 0.04% | 0.08% | 0.63%        | 0.79%        | 1.11%  | 0.66%  | +   |     | TRBV14-01 |
| TRBV11-03 | 0.72%                  | 0.13% | 0.26% | 0.46%        | 0.98%        | 0.63%  | 0.63%  |     |     | TRBV11-03 |
| TRBV10-01 | 0.73%                  | 0.02% | 0.04% | 0.68%        | 0.77%        | 0.24%  | 0.67%  | -   | -   | TRBV10-01 |
| TRBV10-02 | 0.75%                  | 0.13% | 0.26% | 0.50%        | 1.01%        | 0.95%  | 0.27%  |     | -   | TRBV10-02 |
| TRBV20-01 | 0.75%                  | 0.02% | 0.05% | 0.71%        | 0.80%        | 0.24%  | 0.86%  | -   | +   | TRBV20-01 |
| TRBV07-08 | 0.81%                  | 0.04% | 0.08% | 0.73%        | 0.88%        | 1.50%  | 0.85%  | +   |     | TRBV07-08 |
| TRBV15-01 | 0.81%                  | 0.02% | 0.03% | 0.78%        | 0.85%        | 0.55%  | 1.10%  | -   | +   | TRBV15-01 |
| TRBV21-01 | 0.85%                  | 0.02% | 0.04% | 0.81%        | 0.89%        | 1.50%  | 1.21%  | +   | +   | TRBV21-01 |
| TRBV04-03 | 0.91%                  | 0.90% | 1.81% | -0.89%       | 2.72%        | 1.97%  | 2.85%  |     | +   | TRBV04-03 |
| TRBV24    | 1.19%                  | 0.37% | 0.74% | 0.45%        | 1.93%        | 0.87%  | 1.39%  |     |     | TRBV24    |
| TRBV25-01 | 1.27%                  | 0.15% | 0.31% | 0.96%        | 1.58%        | 2.13%  | 1.08%  | +   |     | TRBV25-01 |
| TRBV04-02 | 1.34%                  | 0.22% | 0.43% | 0.91%        | 1.78%        | 0.87%  | 2.35%  |     | +   | TRBV04-02 |
| TRBV07-03 | 1.54%                  | 0.38% | 0.76% | 0.78%        | 2.30%        | 0.79%  | 2.29%  |     |     | TRBV07-03 |
| TRBV18-01 | 1.61%                  | 0.03% | 0.06% | 1.55%        | 1.67%        | 1.58%  | 1.63%  |     |     | TRBV18-01 |
| TRBV29-01 | 1.63%                  | 0.42% | 0.84% | 0.79%        | 2.47%        | 1.34%  | 1.98%  |     |     | TRBV29-01 |
| TRBV05-06 | 1.63%                  | 0.01% | 0.03% | 1.60%        | 1.66%        | 1.50%  | 1.70%  | -   | +   | TRBV05-06 |
| TRBV06-06 | 1.64%                  | 0.12% | 0.23% | 1.40%        | 1.87%        | 2.05%  | 1.08%  | +   | -   | TRBV06-06 |
| TRBV11-02 | 2.07%                  | 0.07% | 0.15% | 1.93%        | 2.22%        | 2.21%  | 1.42%  | +   | -   | TRBV11-02 |
| TRBV05-04 | 2.27%                  | 0.01% | 0.02% | 2.25%        | 2.29%        | 1.34%  | 2.06%  | -   | -   | TRBV05-04 |
| TRBV10-03 | 2.30%                  | 0.36% | 0.71% | 1.59%        | 3.01%        | 1.11%  | 2.24%  |     |     | TRBV10-03 |
| TRBV06    | 2.45%                  | 0.63% | 1.27% | 1.18%        | 3.72%        | 4.82%  | 4.09%  | +   | +   | TRBV06    |
| TRBV07-02 | 2.56%                  | 0.41% | 0.81% | 1.75%        | 3.38%        | 7.58%  | 4.83%  | +   | +   | TRBV07-02 |
| TRBV06-01 | 2.88%                  | 0.05% | 0.09% | 2.79%        | 2.98%        | 2.76%  | 1.59%  | -   | -   | TRBV06-01 |
| TRBV30-01 | 2.98%                  | 1.55% | 3.10% | -0.13%       | 6.08%        | 1.58%  | 4.28%  |     |     | TRBV30-01 |
| TRBV06-05 | 3.10%                  | 0.42% | 0.83% | 2.27%        | 3.93%        | 4.11%  | 3.23%  | +   |     | TRBV06-05 |
| TRBV03    | 3.17%                  | 0.18% | 0.37% | 2.80%        | 3.54%        | 5.13%  | 2.66%  | +   | -   | TRBV03    |
| TRBV02-01 | 3.27%                  | 0.19% | 0.37% | 2.90%        | 3.65%        | 3.63%  | 2.23%  |     | -   | TRBV02-01 |
| TRBV12    | 3.70%                  | 0.18% | 0.37% | 3.33%        | 4.07%        | 3.71%  | 3.28%  |     | -   | TRBV12    |
| TRBV07-09 | 3.86%                  | 0.70% | 1.41% | 2.45%        | 5.27%        | 4.66%  | 3.42%  |     |     | TRBV07-09 |
| TRBV04-01 | 3.93%                  | 0.62% | 1.25% | 2.68%        | 5.17%        | 1.74%  | 2.67%  | -   | -   | TRBV04-01 |
| TRBV09-01 | 4.01%                  | 0.24% | 0.48% | 3.53%        | 4.49%        | 4.42%  | 4.05%  |     |     | TRBV09-01 |
| TRBV19-01 | 5.68%                  | 0.64% | 1.28% | 4.40%        | 6.96%        | 4.27%  | 5.09%  | -   |     | TRBV19-01 |
| TRBV27-01 | 6.03%                  | 0.32% | 0.64% | 5.39%        | 6.67%        | 2.29%  | 4.26%  | -   | -   | TRBV27-01 |
| TRBV28-01 | 7.08%                  | 2.84% | 5.68% | 1.40%        | 12.76%       | 4.98%  | 7.83%  |     |     | TRBV28-01 |
| TRBV05-01 | 7.44%                  | 0.91% | 1.81% | 5.63%        | 9.25%        | 4.34%  | 5.66%  | -   |     | TRBV05-01 |
| TRBV20    | 7.59%                  | 0.06% | 0.13% | 7.46%        | 7.72%        | 7.74%  | 7.69%  | +   |     | TRBV20    |
| Total     | Controls (mean; n=2)   | SEM   | 2xSEM | Mean - 2xSEM | Mean + 2xSEM | pt1    | pt2    | pt1 | pt2 | Total     |
| TRBJ02-06 | 1.40%                  | 0.18% | 0.35% | 1.05%        | 1.76%        | 2.45%  | 1.42%  | +   |     | TRBJ02-06 |
| TRBJ02-04 | 1.68%                  | 0.07% | 0.14% | 1.54%        | 1.82%        | 2.69%  | 1.72%  | +   |     | TRBJ02-04 |
| TRBJ01-06 | 1.87%                  | 1.40% | 2.80% | -0.93%       | 4.67%        | 1.42%  | 0.99%  |     |     | TRBJ01-06 |
| TRBJ01-04 | 3.37%                  | 0.05% | 0.10% | 3.27%        | 3.47%        | 3.24%  | 3.85%  |     | +   | TRBJ01-04 |
| TRBJ01-03 | 3.42%                  | 0.07% | 0.15% | 3.28%        | 3.57%        | 3.48%  | 3.73%  |     | +   | TRBJ01-03 |
| TRBJ02-05 | 7.25%                  | 0.42% | 0.85% | 6.41%        | 8.10%        | 11.69% | 8.76%  | +   | +   | TRBJ02-05 |
| TRBJ02-02 | 7.26%                  | 0.57% | 1.14% | 6.12%        | 8.39%        | 7.74%  | 6.65%  |     |     | TRBJ02-02 |
| TRBJ01-05 | 7.44%                  | 0.64% | 1.29% | 6.15%        | 8.73%        | 8.14%  | 8.44%  |     |     | TRBJ01-05 |
| TRBJ01-01 | 10.27%                 | 0.19% | 0.37% | 9.90%        | 10.64%       | 7.58%  | 12.74% |     | +   | TRBJ01-01 |
| TRBJ02-03 | 10.61%                 | 0.25% | 0.50% | 10.10%       | 11.11%       | 11.53% | 10.72% | +   |     | TRBJ02-03 |
| TRBJ02-01 | 12.14%                 | 0.42% | 0.85% | 11.29%       | 12.98%       | 15.56% | 10.73% | +   | -   | TRBJ02-01 |
| TRBJ01-02 | 12.80%                 | 0.24% | 0.48% | 12.31%       | 13.28%       | 8.14%  | 11.62% | -   | -   | TRBJ01-02 |
| TRBJ02-07 | 20.47%                 | 0.36% | 0.72% | 19.75%       | 21.18%       | 16.35% | 18.60% | -   | -   | TRBJ02-07 |
| TRG-Total |                        |       |       |              |              |        |        |     |     |           |
| Total     | Controls (mean; n=4)   | SEM   | 2xSEM | Mean - 2xSEM | Mean + 2xSEM | pt1    | pt2    | pt1 | pt2 | Total     |
| TRGV5     | 2.05%                  | 0.3%  | 0.57% | 1.47%        | 2.62%        | 4.64%  | 2.56%  | +   |     | TRGV5     |
| TRGV9     | 3.03%                  | 0.5%  | 0.95% | 2.08%        | 3.98%        | 2.72%  | 1.55%  |     | -   | TRGV9     |
| TRGV11    | 6.28%                  | 0.2%  | 0.46% | 5.82%        | 6.74%        | 3.16%  | 4.16%  | -   | -   | TRGV11    |
| TRGV3     | 8.81%                  | 0.9%  | 1.71% | 7.10%        | 10.51%       | 12.38% | 8.46%  | +   |     | TRGV3     |
| TRGV4     | 14.05%                 | 2.1%  | 4.21% | 9.84%        | 18.26%       | 29.98% | 21.29% | +   | +   | TRGV4     |
| TRGV8     | 14.54%                 | 0.5%  | 1.02% | 13.52%       | 15.56%       | 14.18% | 14.57% |     |     | TRGV8     |
| TRGV2     | 19.26%                 | 1.5%  | 2.96% | 16.30%       | 22.22%       | 10.34% | 17.32% | -   |     | TRGV2     |
| TRGV10    | 31.89%                 | 0.7%  | 1.36% | 30.53%       | 33.24%       | 22.25% | 30.08% | -   | -   | TRGV10    |

| IGH-Total  |                      |       |       |              |              |        |        |     |     |            |
|------------|----------------------|-------|-------|--------------|--------------|--------|--------|-----|-----|------------|
| Total      | Controls (mean; n=4) | SEM   | 2xSEM | Mean - 2xSEM | Mean + 2xSEM | pt1    | pt2    | pt1 | pt2 | Total      |
| IGHV3-13   | 0.42%                | 0.13% | 0.27% | 0.15%        | 0.68%        | 0.62%  | 1.59%  |     | +   | IGHV3-13   |
| IGHV2-70   | 0.50%                | 0.16% | 0.32% | 0.18%        | 0.82%        | 0.23%  | 0.09%  |     | -   | IGHV2-70   |
| IGHV3-43   | 0.50%                | 0.21% | 0.42% | 0.09%        | 0.92%        | 1.15%  | 0.36%  | +   |     | IGHV3-43   |
| IGHV4-30-2 | 0.63%                | 0.18% | 0.36% | 0.26%        | 0.99%        | 0.00%  | 0.63%  | -   |     | IGHV4-30-2 |
| IGHV1-24   | 0.79%                | 0.06% | 0.12% | 0.67%        | 0.91%        | 0.75%  | 0.51%  |     |     | IGHV1-24   |
| IGHV3-66   | 0.84%                | 0.19% | 0.37% | 0.47%        | 1.21%        | 1.56%  | 0.00%  | +   | -   | IGHV3-66   |
| IGHV3-64   | 0.85%                | 0.20% | 0.40% | 0.44%        | 1.25%        | 0.00%  | 0.03%  | -   | -   | IGHV3-64   |
| IGHV4-31   | 0.97%                | 0.31% | 0.63% | 0.34%        | 1.59%        | 1.03%  | 0.78%  |     |     | IGHV4-31   |
| IGHV6-1    | 0.97%                | 0.34% | 0.68% | 0.30%        | 1.65%        | 0.46%  | 0.57%  |     |     | IGHV6-1    |
| IGHV2-5    | 1.14%                | 0.29% | 0.59% | 0.55%        | 1.73%        | 0.53%  | 0.45%  | -   | -   | IGHV2-5    |
| IGHV3-53   | 1.28%                | 0.24% | 0.47% | 0.80%        | 1.75%        | 3.35%  | 3.02%  | +   | +   | IGHV3-53   |
| IGHV3-74   | 1.44%                | 0.33% | 0.66% | 0.78%        | 2.11%        | 1.96%  | 2.37%  |     | +   | IGHV3-74   |
| IGHV1-3    | 1.47%                | 0.36% | 0.71% | 0.76%        | 2.19%        | 0.93%  | 0.00%  |     | -   | IGHV1-3    |
| IGHV1-8    | 1.80%                | 0.47% | 0.94% | 0.86%        | 2.75%        | 1.46%  | 1.32%  |     |     | IGHV1-8    |
| IGHV4-4    | 1.88%                | 0.32% | 0.63% | 1.24%        | 2.51%        | 1.09%  | 3.14%  |     | +   | IGHV4-4    |
| IGHV3-15   | 1.98%                | 0.73% | 1.46% | 0.52%        | 3.44%        | 3.19%  | 8.19%  |     | +   | IGHV3-15   |
| IGHV5-51   | 2.06%                | 0.32% | 0.65% | 1.41%        | 2.70%        | 0.55%  | 1.10%  | -   | -   | IGHV5-51   |
| IGHV1-46   | 2.24%                | 0.51% | 1.03% | 1.21%        | 3.27%        | 0.48%  | 0.46%  | -   | -   | IGHV1-46   |
| IGHV3-30-3 | 2.57%                | 1.12% | 2.24% | 0.33%        | 4.81%        | 0.00%  | 0.01%  | -   | -   | IGHV3-30-3 |
| IGHV3-11   | 2.70%                | 0.55% | 1.09% | 1.61%        | 3.79%        | 4.25%  | 4.31%  | +   | +   | IGHV3-11   |
| IGHV3-7    | 2.78%                | 0.66% | 1.32% | 1.46%        | 4.11%        | 3.00%  | 6.48%  |     | +   | IGHV3-7    |
| IGHV3-33   | 2.89%                | 0.92% | 1.85% | 1.04%        | 4.73%        | 3.80%  | 4.17%  |     |     | IGHV3-33   |
| IGHV3-48   | 3.23%                | 0.58% | 1.17% | 2.06%        | 4.40%        | 3.29%  | 5.46%  |     | +   | IGHV3-48   |
| IGHV3-9    | 3.38%                | 0.98% | 1.96% | 1.42%        | 5.33%        | 3.75%  | 6.79%  |     | +   | IGHV3-9    |
| IGHV1-2    | 3.58%                | 0.90% | 1.79% | 1.79%        | 5.37%        | 2.15%  | 4.02%  |     |     | IGHV1-2    |
| IGHV4-61   | 4.35%                | 1.14% | 2.27% | 2.08%        | 6.62%        | 1.37%  | 1.89%  | -   | -   | IGHV4-61   |
| IGHV4-39   | 4.63%                | 0.79% | 1.58% | 3.05%        | 6.21%        | 5.19%  | 6.12%  |     |     | IGHV4-39   |
| IGHV3-21   | 5.02%                | 1.21% | 2.42% | 2.60%        | 7.44%        | 3.97%  | 8.12%  |     | +   | IGHV3-21   |
| IGHV1-18   | 6.05%                | 1.14% | 2.28% | 3.77%        | 8.33%        | 1.71%  | 2.29%  | -   | -   | IGHV1-18   |
| IGHV3-23   | 6.19%                | 1.65% | 3.30% | 2.89%        | 9.48%        | 1.37%  | 0.21%  | -   | -   | IGHV3-23   |
| IGHV1-69   | 6.67%                | 1.74% | 3.48% | 3.19%        | 10.16%       | 1.69%  | 0.86%  | -   | -   | IGHV1-69   |
| IGHV3-30   | 7.27%                | 1.54% | 3.08% | 4.19%        | 10.35%       | 6.15%  | 10.39% |     | +   | IGHV3-30   |
| IGHV4-34   | 7.78%                | 1.58% | 3.16% | 4.62%        | 10.94%       | 32.89% | 6.86%  | +   |     | IGHV4-34   |
| IGHV4-59   | 7.95%                | 1.58% | 3.15% | 4.80%        | 11.10%       | 2.87%  | 4.00%  | -   | -   | IGHV4-59   |
| Total      | Controls (mean; n=4) | SEM   | 2xSEM | Mean - 2xSEM | Mean + 2xSEM | pt1    | pt2    | pt1 | pt2 | Total      |
| IGHD6-25   | 0.54%                | 0.18% | 0.36% | 0.18%        | 0.90%        | 0.53%  | 0.37%  |     |     | IGHD6-25   |
| IGHD1-14   | 0.86%                | 0.06% | 0.12% | 0.74%        | 0.98%        | 1.07%  | 0.87%  | +   |     | IGHD1-14   |
| IGHD7-27   | 1.05%                | 1.44% | 2.88% | -1.83%       | 3.93%        | 1.01%  | 5.50%  |     | +   | IGHD7-27   |
| IGHD1-20   | 1.05%                | 0.70% | 1.40% | -0.35%       | 2.45%        | 0.45%  | 0.48%  |     |     | IGHD1-20   |
| IGHD4-11   | 1.61%                | 0.54% | 1.08% | 0.53%        | 2.68%        | 1.31%  | 1.65%  |     |     | IGHD4-11   |
| IGHD1-7    | 1.76%                | 0.74% | 1.49% | 0.28%        | 3.25%        | 0.55%  | 0.21%  |     | -   | IGHD1-7    |
| IGHD1-1    | 2.24%                | 0.95% | 1.90% | 0.33%        | 4.14%        | 1.09%  | 2.38%  |     |     | IGHD1-1    |
| IGHD2-8    | 2.53%                | 0.37% | 0.73% | 1.80%        | 3.26%        | 2.36%  | 1.51%  |     | -   | IGHD2-8    |
| IGHD3-9    | 2.60%                | 0.85% | 1.71% | 0.89%        | 4.31%        | 1.85%  | 1.73%  |     |     | IGHD3-9    |
| IGHD3-16   | 3.06%                | 0.16% | 0.32% | 2.73%        | 3.38%        | 4.21%  | 3.14%  | +   |     | IGHD3-16   |
| IGHD6-6    | 3.11%                | 0.95% | 1.91% | 1.20%        | 5.02%        | 2.76%  | 0.46%  |     | -   | IGHD6-6    |
| IGHD4-23   | 3.42%                | 0.42% | 0.84% | 2.58%        | 4.26%        | 2.37%  | 2.13%  | -   | -   | IGHD4-23   |
| IGHD5-24   | 4.02%                | 0.48% | 0.97% | 3.06%        | 4.99%        | 2.86%  | 1.89%  | -   | -   | IGHD5-24   |
| IGHD2-15   | 4.09%                | 0.46% | 0.91% | 3.18%        | 5.01%        | 10.55% | 14.07% | +   | +   | IGHD2-15   |
| IGHD5-18   | 4.41%                | 0.36% | 0.72% | 3.69%        | 5.13%        | 3.74%  | 2.04%  |     | -   | IGHD5-18   |
| IGHD5-12   | 4.44%                | 0.45% | 0.91% | 3.53%        | 5.34%        | 2.61%  | 2.30%  | -   | -   | IGHD5-12   |
| IGHD2-21   | 4.53%                | 0.03% | 0.06% | 4.47%        | 4.59%        | 4.24%  | 4.47%  | -   |     | IGHD2-21   |
| IGHD4-17   | 5.26%                | 0.75% | 1.50% | 3.76%        | 6.76%        | 6.21%  | 2.44%  |     | -   | IGHD4-17   |
| IGHD1-26   | 6.25%                | 0.58% | 1.15% | 5.10%        | 7.41%        | 6.29%  | 8.94%  |     | +   | IGHD1-26   |
| IGHD3-3    | 6.33%                | 1.23% | 2.46% | 3.87%        | 8.79%        | 4.56%  | 3.35%  |     | -   | IGHD3-3    |
| IGHD6-19   | 6.54%                | 0.76% | 1.52% | 5.02%        | 8.06%        | 6.66%  | 7.57%  |     |     | IGHD6-19   |
| IGHD6-13   | 6.96%                | 0.77% | 1.54% | 5.42%        | 8.50%        | 5.88%  | 9.45%  |     | +   | IGHD6-13   |
| IGHD2-2    | 7.52%                | 0.06% | 0.12% | 7.40%        | 7.65%        | 3.30%  | 3.73%  | -   | -   | IGHD2-2    |
| IGHD3-22   | 8.20%                | 0.67% | 1.35% | 6.86%        | 9.55%        | 8.84%  | 5.96%  |     | -   | IGHD3-22   |
| IGHD3-10   | 8.21%                | 0.20% | 0.40% | 7.82%        | 8.61%        | 14.47% | 13.95% | +   | +   | IGHD3-10   |
| Total      | Controls (mean; n=4) | SEM   | 2xSEM | Mean - 2xSEM | Mean + 2xSEM | pt1    | pt2    | pt1 | pt2 | Total      |
| IGHJ1      | 1.84%                | 0.26% | 0.53% | 1.31%        | 2.37%        | 3.01%  | 3.02%  | +   | +   | IGHJ1      |
| IGHJ2      | 2.77%                | 0.29% | 0.57% | 2.20%        | 3.34%        | 4.21%  | 5.84%  | +   | +   | IGHJ2      |
| IGHJ3      | 11.32%               | 0.66% | 1.32% | 10.00%       | 12.64%       | 14.60% | 17.68% | +   | +   | IGHJ3      |
| IGHJ5      | 11.79%               | 1.75% | 3.51% | 8.29%        | 15.30%       | 8.99%  | 7.23%  | -   | -   | IGHJ5      |



| IGHJ6             | 20.63%                 | 0.37% | 0.73% | 19.90%       | 21.37%       | 10.63% | 18.19% | -   | -   | IGHJ6     |
|-------------------|------------------------|-------|-------|--------------|--------------|--------|--------|-----|-----|-----------|
| IGHJ4             | 51.64%                 | 1.59% | 3.17% | 48.46%       | 54.81%       | 58.56% | 48.01% | +   | -   | IGHJ4     |
| <b>TRB-Unique</b> |                        |       |       |              |              |        |        |     |     |           |
| Unique            | Controls (mean; n = 2) | SEM   | 2xSEM | Mean - 2xSEM | Mean + 2xSEM | pt1    | pt2    | pt1 | pt2 | Unique    |
| TRBV14-01         | 0.69%                  | 0.01% | 0.03% | 0.67%        | 0.72%        | 1.37%  | 0.65%  | +   |     | TRBV14-01 |
| TRBV13-01         | 0.71%                  | 0.12% | 0.23% | 0.47%        | 0.94%        | 0.69%  | 0.56%  |     |     | TRBV13-01 |
| TRBV20-01         | 0.73%                  | 0.01% | 0.02% | 0.71%        | 0.75%        | 0.29%  | 0.87%  | -   | +   | TRBV20-01 |
| TRBV11-03         | 0.76%                  | 0.13% | 0.26% | 0.50%        | 1.02%        | 0.79%  | 0.66%  |     |     | TRBV11-03 |
| TRBV10-02         | 0.76%                  | 0.12% | 0.23% | 0.53%        | 1.00%        | 0.98%  | 0.29%  |     | -   | TRBV10-02 |
| TRBV07-08         | 0.78%                  | 0.10% | 0.20% | 0.58%        | 0.98%        | 1.67%  | 0.94%  | +   |     | TRBV07-08 |
| TRBV15-01         | 0.84%                  | 0.00% | 0.00% | 0.83%        | 0.84%        | 0.69%  | 1.15%  | -   | +   | TRBV15-01 |
| TRBV21-01         | 0.84%                  | 0.02% | 0.04% | 0.80%        | 0.88%        | 1.77%  | 1.08%  | +   | +   | TRBV21-01 |
| TRBV04-03         | 0.98%                  | 0.97% | 1.93% | -0.96%       | 2.91%        | 2.36%  | 2.99%  |     | +   | TRBV04-03 |
| TRBV24            | 1.24%                  | 0.39% | 0.78% | 0.46%        | 2.02%        | 0.88%  | 1.45%  |     |     | TRBV24    |
| TRBV25-01         | 1.25%                  | 0.13% | 0.25% | 1.00%        | 1.51%        | 1.37%  | 1.10%  |     |     | TRBV25-01 |
| TRBV04-02         | 1.29%                  | 0.25% | 0.50% | 0.78%        | 1.79%        | 0.88%  | 2.11%  |     | +   | TRBV04-02 |
| TRBV07-03         | 1.42%                  | 0.30% | 0.60% | 0.82%        | 2.02%        | 0.88%  | 2.19%  |     | +   | TRBV07-03 |
| TRBV18-01         | 1.56%                  | 0.02% | 0.05% | 1.52%        | 1.61%        | 1.57%  | 1.51%  |     | -   | TRBV18-01 |
| TRBV06-06         | 1.64%                  | 0.11% | 0.23% | 1.41%        | 1.87%        | 2.36%  | 1.15%  | +   | -   | TRBV06-06 |
| TRBV05-06         | 1.71%                  | 0.03% | 0.06% | 1.64%        | 1.77%        | 1.47%  | 1.79%  | -   | +   | TRBV05-06 |
| TRBV29-01         | 1.71%                  | 0.43% | 0.86% | 0.85%        | 2.57%        | 1.47%  | 2.11%  |     |     | TRBV29-01 |
| TRBV11-02         | 1.99%                  | 0.11% | 0.23% | 1.76%        | 2.21%        | 2.26%  | 1.45%  | +   | -   | TRBV11-02 |
| TRBV05-04         | 2.22%                  | 0.03% | 0.05% | 2.17%        | 2.28%        | 1.47%  | 2.02%  | -   | -   | TRBV05-04 |
| TRBV10-03         | 2.27%                  | 0.35% | 0.69% | 1.58%        | 2.96%        | 1.28%  | 2.30%  | -   |     | TRBV10-03 |
| TRBV07-02         | 2.64%                  | 0.43% | 0.86% | 1.78%        | 3.50%        | 6.18%  | 5.16%  | +   | +   | TRBV07-02 |
| TRBV06            | 2.67%                  | 0.71% | 1.42% | 1.25%        | 4.09%        | 4.91%  | 4.42%  | +   | +   | TRBV06    |
| TRBV06-01         | 2.98%                  | 0.04% | 0.08% | 2.90%        | 3.05%        | 2.16%  | 1.65%  | -   | -   | TRBV06-01 |
| TRBV30-01         | 3.01%                  | 1.57% | 3.13% | -0.12%       | 6.14%        | 1.57%  | 3.93%  |     |     | TRBV30-01 |
| TRBV03            | 3.01%                  | 0.17% | 0.33% | 2.68%        | 3.34%        | 5.30%  | 2.49%  | +   | -   | TRBV03    |
| TRBV02-01         | 3.12%                  | 0.28% | 0.56% | 2.56%        | 3.68%        | 3.04%  | 2.12%  |     | -   | TRBV02-01 |
| TRBV06-05         | 3.21%                  | 0.37% | 0.73% | 2.48%        | 3.94%        | 4.12%  | 3.29%  | +   |     | TRBV06-05 |
| TRBV07-09         | 3.65%                  | 0.56% | 1.13% | 2.52%        | 4.78%        | 3.93%  | 3.29%  |     |     | TRBV07-09 |
| TRBV04-01         | 3.80%                  | 0.49% | 0.98% | 2.82%        | 4.77%        | 2.16%  | 2.55%  | -   | -   | TRBV04-01 |
| TRBV12            | 3.80%                  | 0.18% | 0.35% | 3.45%        | 4.16%        | 4.02%  | 3.06%  |     | -   | TRBV12    |
| TRBV09-01         | 4.00%                  | 0.25% | 0.49% | 3.51%        | 4.50%        | 4.71%  | 3.99%  | +   |     | TRBV09-01 |
| TRBV19-01         | 5.32%                  | 0.62% | 1.25% | 4.08%        | 6.57%        | 4.71%  | 4.68%  |     |     | TRBV19-01 |
| TRBV27-01         | 6.13%                  | 0.16% | 0.32% | 5.81%        | 6.45%        | 2.65%  | 4.30%  | -   | -   | TRBV27-01 |
| TRBV28-01         | 7.06%                  | 2.82% | 5.63% | 1.42%        | 12.69%       | 5.00%  | 7.93%  |     |     | TRBV28-01 |
| TRBV05-01         | 7.48%                  | 0.98% | 1.95% | 5.53%        | 9.43%        | 4.22%  | 5.99%  | -   |     | TRBV05-01 |
| TRBV20            | 7.98%                  | 0.21% | 0.42% | 7.56%        | 8.40%        | 8.34%  | 7.93%  |     |     | TRBV20    |
| Unique            | Controls (mean; n=2)   | SEM   | 2xSEM | Mean - 2xSEM | Mean + 2xSEM | pt1    | pt2    | pt1 | pt2 | Unique    |
| TRBJ02-06         | 1.52%                  | 0.20% | 0.40% | 1.12%        | 1.91%        | 2.55%  | 1.55%  | +   |     | TRBJ02-06 |
| TRBJ01-06         | 1.58%                  | 1.06% | 2.13% | -0.55%       | 3.71%        | 1.77%  | 1.16%  |     |     | TRBJ01-06 |
| TRBJ02-04         | 1.83%                  | 0.06% | 0.12% | 1.71%        | 1.95%        | 2.94%  | 1.99%  | +   | +   | TRBJ02-04 |
| TRBJ01-04         | 3.51%                  | 0.03% | 0.07% | 3.44%        | 3.58%        | 3.24%  | 3.47%  | -   |     | TRBJ01-04 |
| TRBJ01-03         | 3.52%                  | 0.07% | 0.13% | 3.38%        | 3.65%        | 3.73%  | 3.94%  | +   | +   | TRBJ01-03 |
| TRBJ01-05         | 6.88%                  | 0.64% | 1.29% | 5.60%        | 8.17%        | 5.69%  | 6.55%  |     |     | TRBJ01-05 |
| TRBJ02-02         | 7.57%                  | 0.60% | 1.20% | 6.37%        | 8.78%        | 7.65%  | 6.60%  |     |     | TRBJ02-02 |
| TRBJ02-05         | 7.86%                  | 0.49% | 0.97% | 6.89%        | 8.84%        | 11.58% | 9.80%  | +   | +   | TRBJ02-05 |
| TRBJ01-01         | 9.89%                  | 0.16% | 0.32% | 9.57%        | 10.21%       | 6.18%  | 9.57%  | -   |     | TRBJ01-01 |
| TRBJ01-02         | 11.28%                 | 0.50% | 0.99% | 10.29%       | 12.27%       | 7.46%  | 11.52% | -   |     | TRBJ01-02 |
| TRBJ02-03         | 11.50%                 | 0.45% | 0.90% | 10.60%       | 12.40%       | 12.07% | 12.13% |     |     | TRBJ02-03 |
| TRBJ02-01         | 13.11%                 | 0.38% | 0.76% | 12.35%       | 13.87%       | 16.98% | 11.95% | +   | -   | TRBJ02-01 |
| TRBJ02-07         | 19.91%                 | 0.54% | 1.08% | 18.83%       | 20.99%       | 18.16% | 19.73% | -   |     | TRBJ02-07 |
| <b>TRG-Unique</b> |                        |       |       |              |              |        |        |     |     |           |
| Unique            | Controls (mean; n=4)   | SEM   | 2xSEM | Mean - 2xSEM | Mean + 2xSEM | pt1    | pt2    | pt1 | pt2 | Unique    |
| TRGV5             | 3.00%                  | 0.37% | 0.74% | 2.26%        | 3.74%        | 6.78%  | 3.89%  | +   | +   | TRGV5     |
| TRGV9             | 4.52%                  | 0.29% | 0.58% | 3.94%        | 5.11%        | 3.97%  | 3.40%  |     | -   | TRGV9     |
| TRGV11            | 4.77%                  | 0.97% | 1.95% | 2.82%        | 6.72%        | 2.68%  | 3.25%  | -   |     | TRGV11    |
| TRGV3             | 11.34%                 | 1.25% | 2.50% | 8.85%        | 13.84%       | 16.39% | 10.75% | +   |     | TRGV3     |
| TRGV8             | 14.57%                 | 0.34% | 0.68% | 13.89%       | 15.26%       | 14.68% | 13.58% |     |     | TRGV8     |
| TRGV4             | 15.09%                 | 2.64% | 5.28% | 9.81%        | 20.37%       | 22.96% | 21.16% | +   | +   | TRGV4     |
| TRGV2             | 22.22%                 | 3.26% | 6.53% | 15.70%       | 28.75%       | 13.05% | 21.04% | -   |     | TRGV2     |
| TRGV10            | 24.19%                 | 4.35% | 8.69% | 15.50%       | 32.88%       | 19.11% | 22.90% |     |     | TRGV10    |
| <b>IGH-Unique</b> |                        |       |       |              |              |        |        |     |     |           |
| Unique            | Controls (mean; n=4)   | SEM   | 2xSEM | Mean - 2xSEM | Mean + 2xSEM | pt1    | pt2    | pt1 | pt2 | Unique    |
| IGHV3-66          | 0.35%                  | 0.16% | 0.32% | 0.03%        | 0.68%        | 1.34%  | 0.00%  | +   | -   | IGHV3-66  |

|            |                      |       |       |              |              |        |        |     |     |            |
|------------|----------------------|-------|-------|--------------|--------------|--------|--------|-----|-----|------------|
| IGHV3-72   | 0.36%                | 0.15% | 0.30% | 0.06%        | 0.65%        | 0.58%  | 0.30%  |     |     | IGHV3-72   |
| IGHV1-58   | 0.45%                | 0.20% | 0.40% | 0.05%        | 0.85%        | 0.30%  | 0.37%  |     |     | IGHV1-58   |
| IGHV3-64   | 0.50%                | 0.20% | 0.39% | 0.10%        | 0.89%        | 0.01%  | 0.06%  | -   | -   | IGHV3-64   |
| IGHV2-70   | 0.52%                | 0.27% | 0.55% | -0.02%       | 1.07%        | 0.40%  | 0.16%  |     |     | IGHV2-70   |
| IGHV6-1    | 0.55%                | 0.23% | 0.46% | 0.09%        | 1.01%        | 0.36%  | 0.65%  |     |     | IGHV6-1    |
| IGHV3-73   | 0.56%                | 0.07% | 0.15% | 0.41%        | 0.71%        | 0.72%  | 1.17%  | +   | +   | IGHV3-73   |
| IGHV1-24   | 0.74%                | 0.24% | 0.48% | 0.27%        | 1.22%        | 0.67%  | 0.65%  |     |     | IGHV1-24   |
| IGHV3-43   | 0.75%                | 0.24% | 0.48% | 0.27%        | 1.23%        | 0.97%  | 0.35%  |     |     | IGHV3-43   |
| IGHV3-13   | 0.79%                | 0.40% | 0.81% | -0.02%       | 1.59%        | 0.62%  | 1.30%  |     |     | IGHV3-13   |
| IGHV2-5    | 0.91%                | 0.46% | 0.92% | -0.01%       | 1.83%        | 0.62%  | 1.05%  |     |     | IGHV2-5    |
| IGHV3-49   | 0.96%                | 0.33% | 0.65% | 0.31%        | 1.61%        | 0.39%  | 0.68%  |     |     | IGHV3-49   |
| IGHV1-3    | 1.06%                | 0.29% | 0.58% | 0.48%        | 1.64%        | 0.90%  | 0.00%  |     | -   | IGHV1-3    |
| IGHV4-31   | 1.19%                | 0.41% | 0.82% | 0.37%        | 2.00%        | 1.27%  | 1.62%  |     |     | IGHV4-31   |
| IGHV4-61   | 1.23%                | 0.42% | 0.85% | 0.38%        | 2.08%        | 1.47%  | 2.03%  |     |     | IGHV4-61   |
| IGHV4-4    | 1.64%                | 0.56% | 1.12% | 0.52%        | 2.76%        | 1.23%  | 3.07%  |     | +   | IGHV4-4    |
| IGHV3-53   | 1.67%                | 0.36% | 0.73% | 0.94%        | 2.40%        | 3.24%  | 2.64%  | +   | +   | IGHV3-53   |
| IGHV1-46   | 1.78%                | 0.76% | 1.51% | 0.27%        | 3.30%        | 0.60%  | 0.72%  |     |     | IGHV1-46   |
| IGHV1-8    | 1.88%                | 0.36% | 0.71% | 1.16%        | 2.59%        | 1.36%  | 1.62%  |     |     | IGHV1-8    |
| IGHV3-74   | 1.98%                | 0.58% | 1.16% | 0.82%        | 3.14%        | 1.80%  | 2.14%  |     |     | IGHV3-74   |
| IGHV1-69   | 2.05%                | 1.35% | 2.70% | -0.65%       | 4.75%        | 1.83%  | 1.48%  |     |     | IGHV1-69   |
| IGHV5-51   | 2.22%                | 0.72% | 1.44% | 0.78%        | 3.66%        | 0.63%  | 1.59%  | -   |     | IGHV5-51   |
| IGHV3-33   | 2.56%                | 0.81% | 1.63% | 0.94%        | 4.19%        | 3.52%  | 4.05%  |     |     | IGHV3-33   |
| IGHV1-2    | 2.98%                | 1.11% | 2.22% | 0.76%        | 5.20%        | 2.43%  | 4.65%  |     |     | IGHV1-2    |
| IGHV3-30-3 | 3.05%                | 0.72% | 1.43% | 1.61%        | 4.48%        | 0.07%  | 0.10%  | -   | -   | IGHV3-30-3 |
| IGHV3-11   | 3.63%                | 1.05% | 2.10% | 1.53%        | 5.73%        | 3.72%  | 4.05%  |     |     | IGHV3-11   |
| IGHV3-15   | 3.78%                | 1.39% | 2.77% | 1.01%        | 6.56%        | 3.05%  | 7.29%  |     | +   | IGHV3-15   |
| IGHV1-18   | 4.71%                | 1.01% | 2.02% | 2.69%        | 6.74%        | 1.86%  | 2.61%  | -   | -   | IGHV1-18   |
| IGHV3-48   | 4.72%                | 1.23% | 2.47% | 2.25%        | 7.19%        | 3.31%  | 4.63%  |     |     | IGHV3-48   |
| IGHV3-7    | 4.79%                | 1.47% | 2.94% | 1.86%        | 7.73%        | 2.98%  | 5.43%  |     |     | IGHV3-7    |
| IGHV4-59   | 5.24%                | 2.49% | 4.98% | 0.26%        | 10.22%       | 3.34%  | 4.47%  |     |     | IGHV4-59   |
| IGHV3-30   | 5.78%                | 1.37% | 2.73% | 3.05%        | 8.51%        | 6.03%  | 9.36%  |     | +   | IGHV3-30   |
| IGHV4-39   | 6.03%                | 2.11% | 4.22% | 1.81%        | 10.25%       | 4.74%  | 6.61%  |     |     | IGHV4-39   |
| IGHV3-9    | 6.50%                | 1.75% | 3.49% | 3.00%        | 9.99%        | 3.97%  | 6.62%  |     |     | IGHV3-9    |
| IGHV3-21   | 8.34%                | 1.65% | 3.29% | 5.05%        | 11.63%       | 4.03%  | 7.47%  | -   |     | IGHV3-21   |
| IGHV4-34   | 10.60%               | 1.97% | 3.95% | 6.65%        | 14.55%       | 34.38% | 7.29%  | +   |     | IGHV4-34   |
| Unique     | Controls (mean; n=4) | SEM   | 2xSEM | Mean - 2xSEM | Mean + 2xSEM | pt1    | pt2    | pt1 | pt2 | Unique     |
| IGHD6-25   | 0.71%                | 0.13% | 0.26% | 0.45%        | 0.97%        | 0.60%  | 0.34%  |     | -   | IGHD6-25   |
| IGHD1-14   | 0.89%                | 0.13% | 0.27% | 0.62%        | 1.16%        | 1.03%  | 0.68%  |     |     | IGHD1-14   |
| IGHD1-20   | 1.20%                | 0.80% | 1.61% | -0.41%       | 2.81%        | 0.44%  | 0.49%  |     |     | IGHD1-20   |
| IGHD7-27   | 1.21%                | 0.36% | 0.71% | 0.50%        | 1.92%        | 0.84%  | 4.71%  |     | +   | IGHD7-27   |
| IGHD1-7    | 2.02%                | 0.91% | 1.82% | 0.20%        | 3.85%        | 0.55%  | 0.31%  |     |     | IGHD1-7    |
| IGHD4-11   | 2.03%                | 0.35% | 0.70% | 1.33%        | 2.73%        | 1.34%  | 1.70%  |     |     | IGHD4-11   |
| IGHD1-1    | 2.74%                | 0.55% | 1.09% | 1.65%        | 3.83%        | 1.14%  | 1.83%  | -   |     | IGHD1-1    |
| IGHD3-9    | 2.99%                | 0.44% | 0.89% | 2.10%        | 3.88%        | 1.75%  | 1.64%  | -   | -   | IGHD3-9    |
| IGHD6-6    | 3.07%                | 0.53% | 1.05% | 2.02%        | 4.12%        | 2.41%  | 0.42%  |     | -   | IGHD6-6    |
| IGHD2-8    | 3.20%                | 1.36% | 2.72% | 0.49%        | 5.92%        | 2.22%  | 1.40%  |     |     | IGHD2-8    |
| IGHD2-21   | 3.49%                | 0.45% | 0.91% | 2.58%        | 4.40%        | 4.51%  | 3.41%  | +   |     | IGHD2-21   |
| IGHD4-23   | 3.50%                | 1.00% | 2.00% | 1.50%        | 5.51%        | 2.43%  | 2.18%  |     |     | IGHD4-23   |
| IGHD3-16   | 3.73%                | 0.59% | 1.19% | 2.54%        | 4.92%        | 4.54%  | 3.20%  |     |     | IGHD3-16   |
| IGHD5-24   | 3.84%                | 0.91% | 1.82% | 2.03%        | 5.66%        | 2.94%  | 1.75%  |     | -   | IGHD5-24   |
| IGHD5-18   | 3.84%                | 0.30% | 0.60% | 3.24%        | 4.45%        | 3.50%  | 1.87%  |     | -   | IGHD5-18   |
| IGHD5-12   | 3.97%                | 0.76% | 1.53% | 2.44%        | 5.50%        | 2.40%  | 2.27%  | -   | -   | IGHD5-12   |
| IGHD2-15   | 4.48%                | 0.58% | 1.17% | 3.31%        | 5.65%        | 11.24% | 15.12% | +   | +   | IGHD2-15   |
| IGHD4-17   | 4.69%                | 0.30% | 0.61% | 4.08%        | 5.30%        | 5.74%  | 2.47%  | +   | -   | IGHD4-17   |
| IGHD1-26   | 5.37%                | 0.44% | 0.88% | 4.48%        | 6.25%        | 6.29%  | 8.64%  | +   | +   | IGHD1-26   |
| IGHD6-19   | 5.56%                | 0.83% | 1.66% | 3.90%        | 7.22%        | 6.57%  | 6.91%  |     |     | IGHD6-19   |
| IGHD3-3    | 6.34%                | 0.72% | 1.44% | 4.90%        | 7.79%        | 5.02%  | 3.71%  |     | -   | IGHD3-3    |
| IGHD6-13   | 6.43%                | 0.33% | 0.65% | 5.78%        | 7.08%        | 5.38%  | 9.07%  |     | +   | IGHD6-13   |
| IGHD3-22   | 7.26%                | 1.57% | 3.15% | 4.11%        | 10.41%       | 9.40%  | 6.40%  |     |     | IGHD3-22   |
| IGHD3-10   | 8.29%                | 1.23% | 2.47% | 5.83%        | 10.76%       | 13.87% | 15.15% | +   | +   | IGHD3-10   |
| IGHD2-2    | 8.71%                | 2.19% | 4.39% | 4.32%        | 13.10%       | 3.66%  | 3.98%  | -   | -   | IGHD2-2    |
| Unique     | Controls (mean; n=4) | SEM   | 2xSEM | Mean - 2xSEM | Mean + 2xSEM | pt1    | pt2    | pt1 | pt2 | Unique     |
| IGHJ1      | 2.53%                | 0.72% | 1.44% | 1.10%        | 3.97%        | 2.84%  | 2.92%  |     |     | IGHJ1      |
| IGHJ2      | 4.08%                | 0.48% | 0.96% | 3.12%        | 5.04%        | 4.78%  | 6.20%  |     | +   | IGHJ2      |
| IGHJ3      | 13.49%               | 1.01% | 2.02% | 11.47%       | 15.50%       | 15.68% | 18.86% | +   | +   | IGHJ3      |
| IGHJ5      | 14.44%               | 0.99% | 1.97% | 12.46%       | 16.41%       | 8.81%  | 7.69%  | -   | -   | IGHJ5      |
| IGHJ6      | 23.78%               | 2.43% | 4.86% | 18.92%       | 28.64%       | 12.69% | 21.31% | -   |     | IGHJ6      |

|              |        |       |       |        |        |        |        |   |  |              |
|--------------|--------|-------|-------|--------|--------|--------|--------|---|--|--------------|
| <b>IGHJ4</b> | 41.67% | 0.83% | 1.66% | 40.01% | 43.33% | 55.21% | 43.01% | + |  | <b>IGHJ4</b> |
|--------------|--------|-------|-------|--------|--------|--------|--------|---|--|--------------|

**Supplementary Table 1. Summary of the *V(D)J* gene usages in the Total and Uniquesquences of T and B cell receptor repertoires from patients and controls.**

The gene usages frequencies of the patients, and mean and two Standard Errors (SE) below or above the mean of the gene frequencies for the healthy controls (Mean  $\pm$  2 x SE) are summarized and compared for the total and unique sequences of the T and B cell receptor repertoires. For each gene that are utilized either more or less than two SE above the mean of the controls were noted with either “+” or “-“ sign, respectively. The gene names (on the far right column) was colored in: green for genes that are higher in both patients; red for the genes that are higher in patient 1; and orange for the genes that are higher in patient 2.
